# Supplementary material for: The structure–activity relationship of copper hydride nanoclusters in hydrogenation and reduction reactions
Source: Royal Society of Chemistry journal article supplement (doi:10.1039/d3na01145c), 2024-01-01
Supplement: d3na01145c1.pdf [file d3na01145c1.pdf]

### Supporting Information

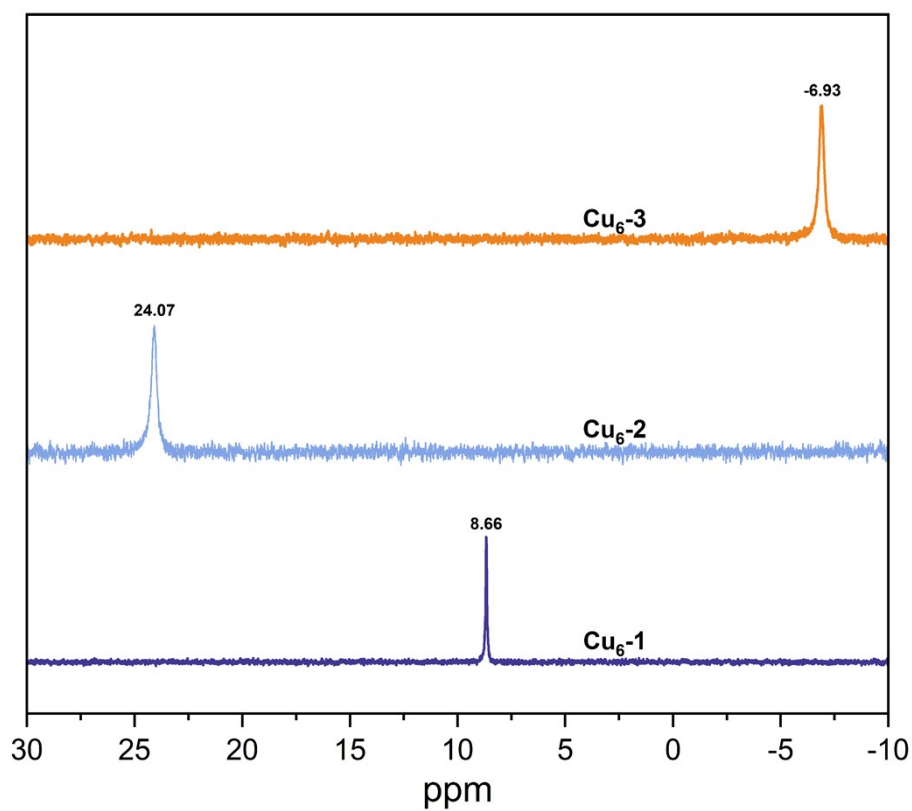

**Figure S1.**  $^{31}\text{P}$  NMR spectrum of  $[\text{CuH}]_6$  in  $\text{C}_6\text{D}_6$ .

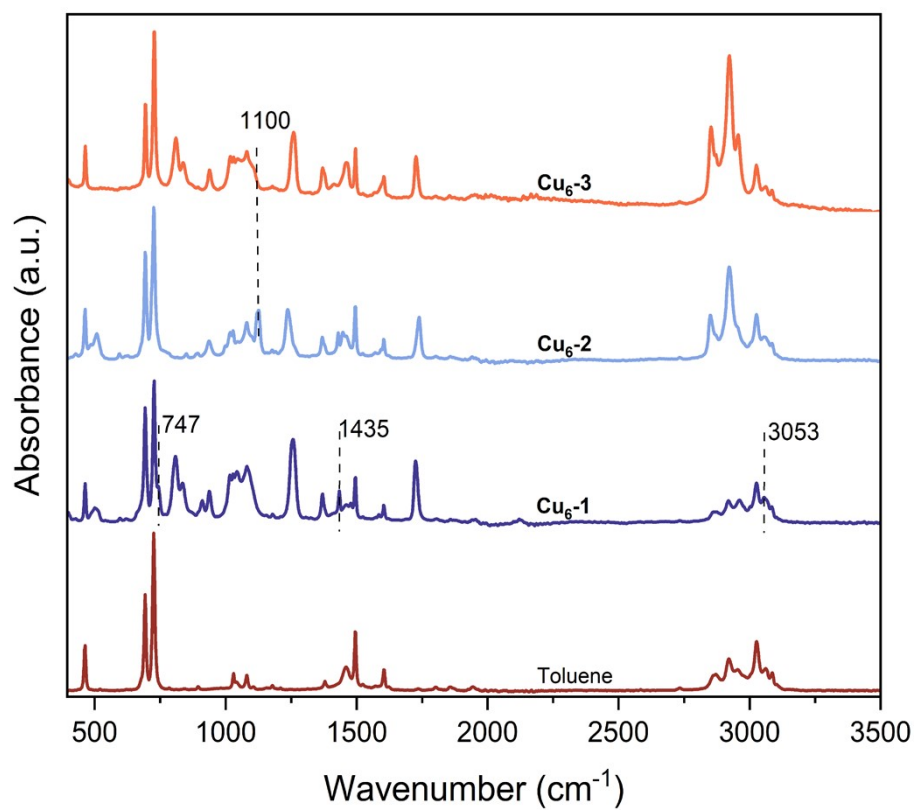

**Figure S2.** The ATR-IR spectra of the toluene and  $[\text{CuH}]_6$ .

(a)

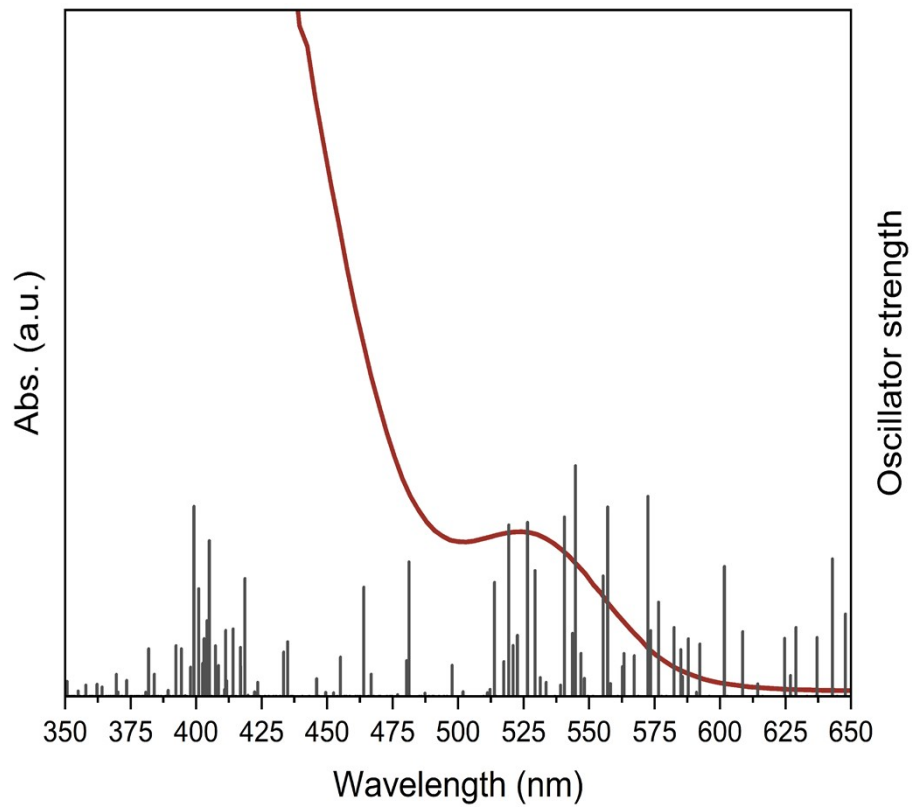

(b)

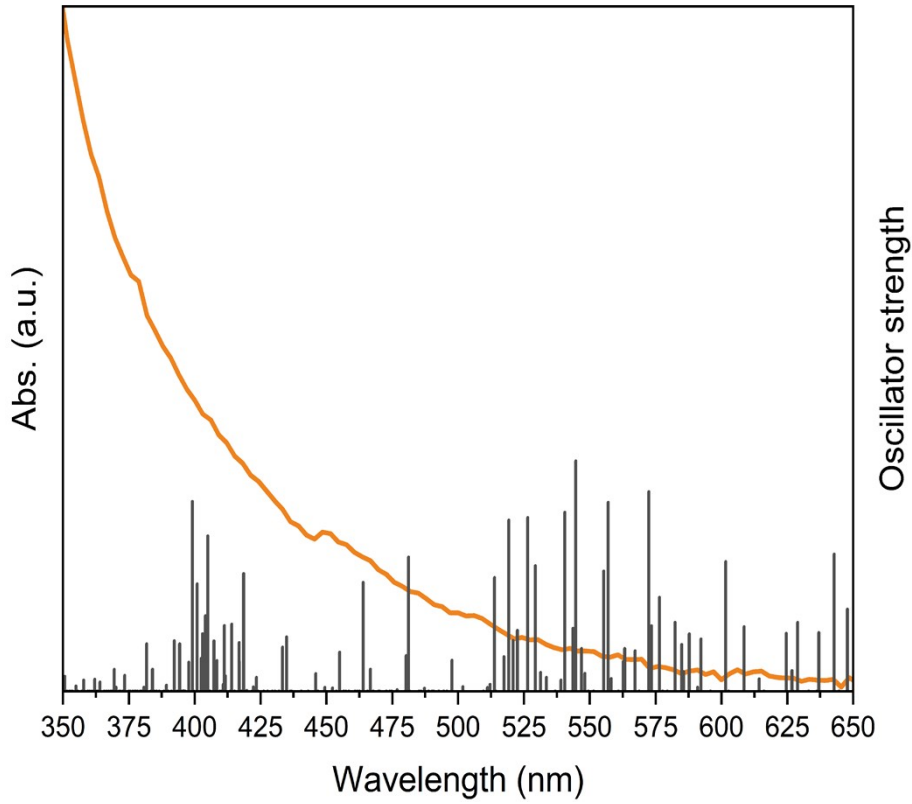

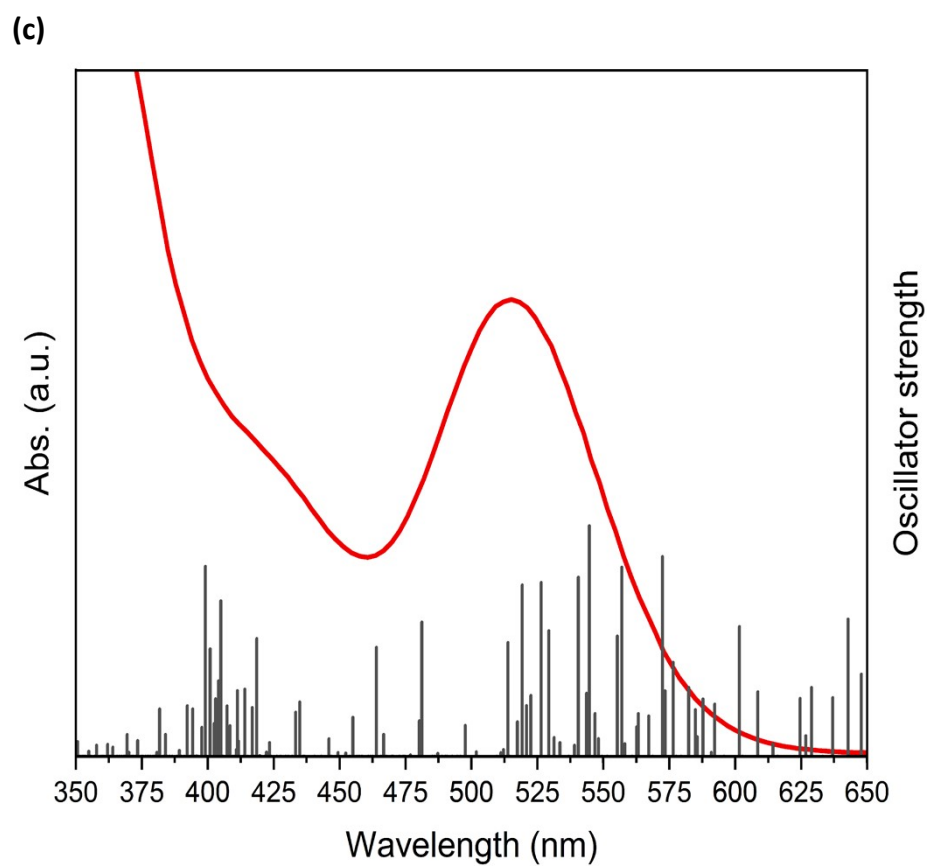

**Figure S3.** Calculated UV-vis absorption spectra of (a) **Cu<sub>6</sub>-1**, (b) **Cu<sub>6</sub>-2** and (c) **Cu<sub>6</sub>-3**.

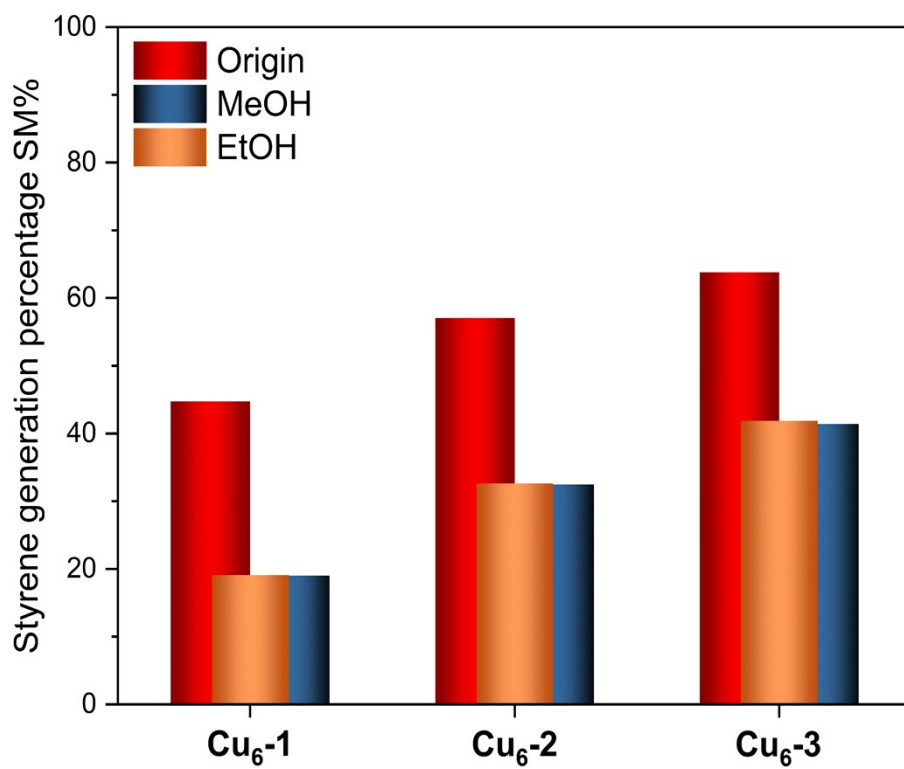

**Figure S4.** Hydrometallation of phenylacetylene using [CuH]<sub>6</sub>.

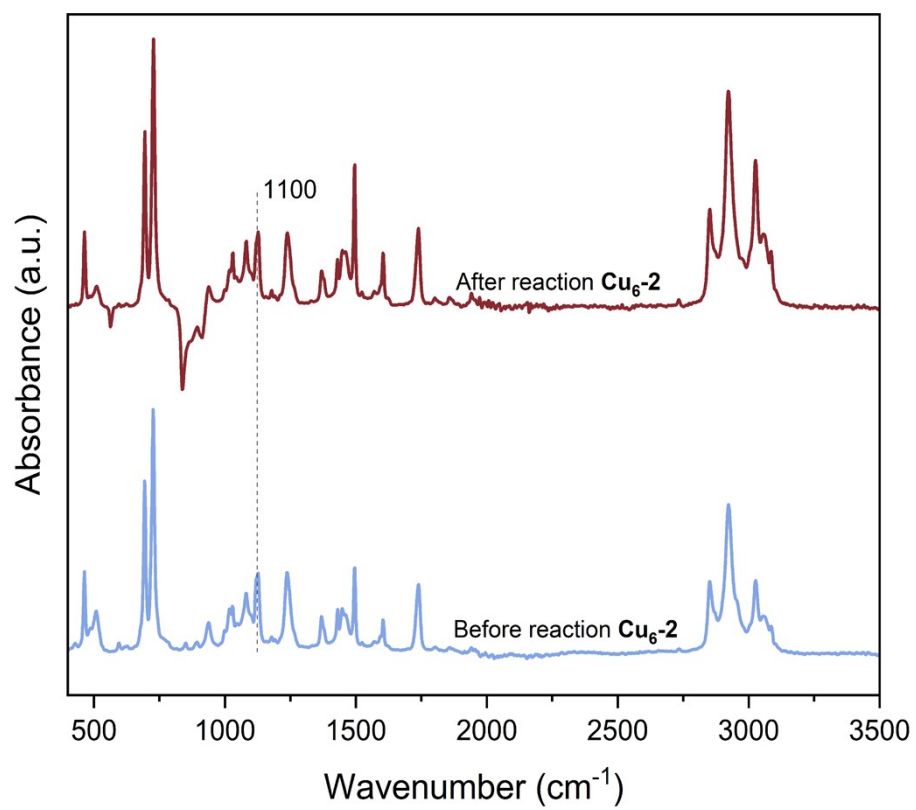

**Figure S5.** The ATR-IR spectrum of **Cu<sub>6</sub>-2** before and after hydrometallation of Alkynes.

(a)

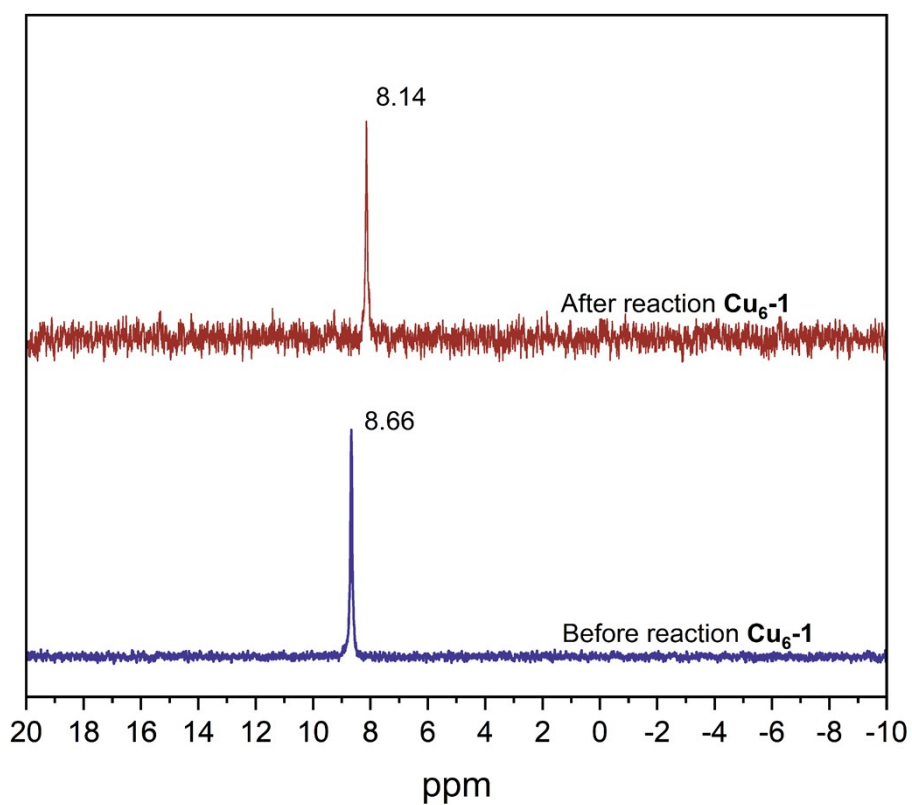

(b)

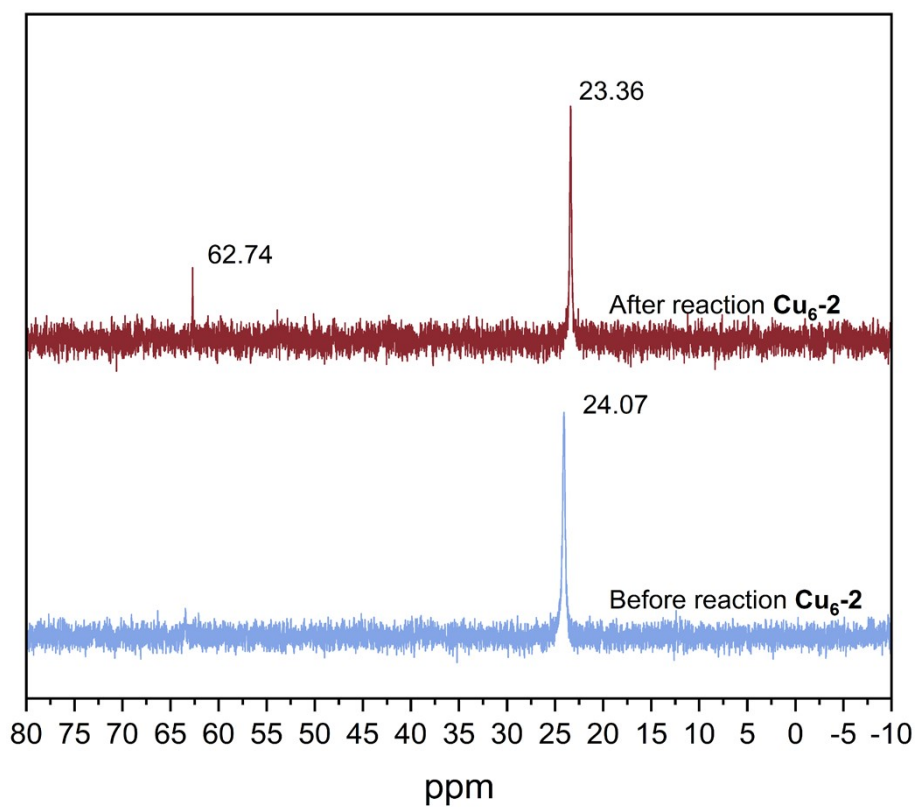

(c)

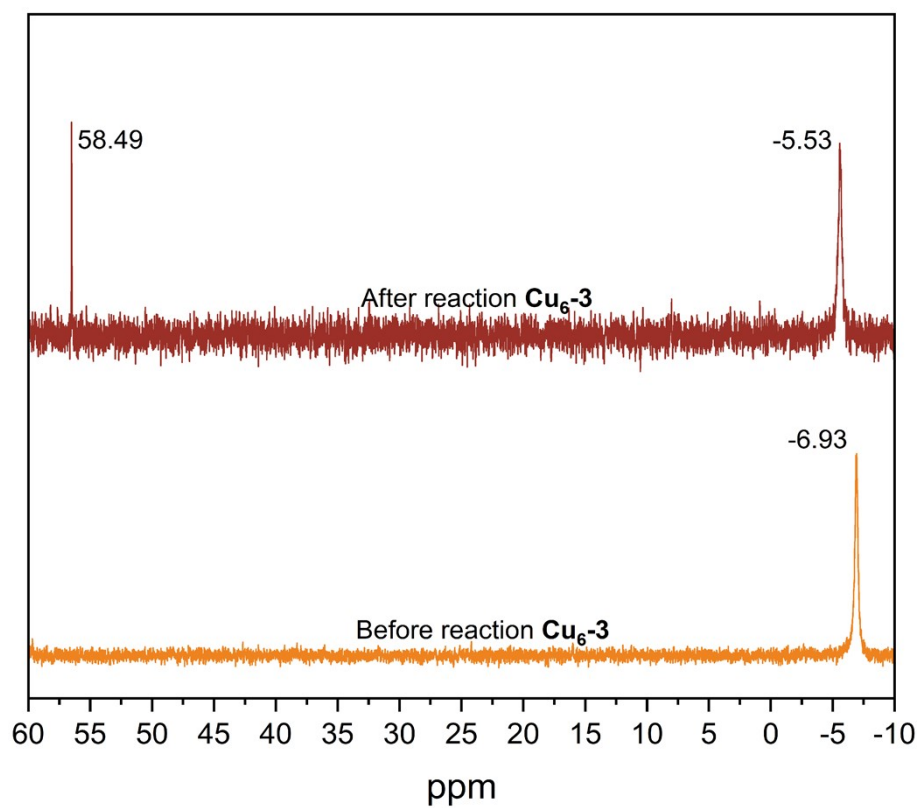

**Figure S6.**  $^{31}\text{P}$  NMR spectrum of (a)  $\text{Cu}_6\text{-1}$ , (b)  $\text{Cu}_6\text{-2}$  and (c)  $\text{Cu}_6\text{-3}$  before and after hydrometallation of Alkynes.



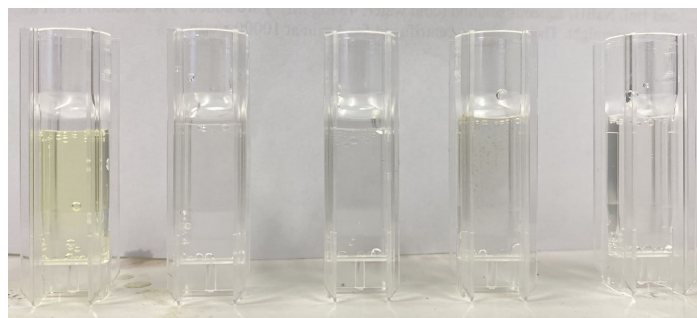

**Figure S7.** Reusability tests of **Cu<sub>6</sub>-3** and changes in solution colour on 4-NP conversion (From right to left indicating the first time to fifth time).

**Table S1.** Mulliken population analysis of selected HOMO and LUMO energy levels.

| Orbital | Energy (eV) | % Cu (3d) | % Cu (sp) | % P   |
|---------|-------------|-----------|-----------|-------|
| HOMO -6 | -11.02      | 18.28     | 3.64      | 21.20 |
| HOMO -5 | -10.84      | 35.06     | 9.36      | 14.07 |
| HOMO -4 | -10.70      | 26.99     | 8.63      | 16.44 |
| HOMO -3 | -10.49      | 31.51     | 6.43      | 14.35 |
| HOMO -2 | -10.47      | 35.75     | 6.72      | 13.84 |
| HOMO -1 | -10.22      | 40.11     | 7.66      | 11.93 |
| HOMO    | -10.21      | 39.50     | 11.06     | 11.70 |
| LUMO    | -9.31       | 50.47     | 15.28     | 7.64  |
| LUMO +1 | -9.15       | 49.33     | 15.31     | 8.57  |
| LUMO +2 | -9.14       | 46.00     | 18.30     | 7.90  |
| LUMO +3 | -9.03       | 52.54     | 14.49     | 7.09  |
| LUMO +4 | -8.58       | 62.62     | 9.55      | 12.14 |
| LUMO +5 | -8.24       | 80.70     | 0         | 8.01  |

**Table S2.** The orbital-orbital transitions, energies and oscillator strengths of excited state 130.

| Transition                  | Nature of transitions | Energy (eV) | Oscillator strengths |
|-----------------------------|-----------------------|-------------|----------------------|
| 187 <i>a</i> → 216 <i>a</i> | HOMO-29 → HOMO        | 2.434       | 0.058                |
| 188 <i>a</i> → 216 <i>a</i> | HOMO-28 → HOMO        | 2.263       | 0.023                |
| 188 <i>a</i> → 218 <i>a</i> | HOMO-28 → LUMO+1      | 3.321       | 0.032                |
| 190 <i>a</i> → 218 <i>a</i> | HOMO-26 → LUMO+1      | 3.152       | 0.020                |
| 190 <i>a</i> → 219 <i>a</i> | HOMO-26 → LUMO+2      | 3.157       | 0.018                |
| 192 <i>a</i> → 216 <i>a</i> | HOMO-24 → HOMO        | 2.07        | 0.027                |
| 192 <i>a</i> → 217 <i>a</i> | HOMO-24 → LUMO        | 2.964       | 0.012                |
| 193 <i>a</i> → 218 <i>a</i> | HOMO-23 → LUMO+1      | 3.118       | 0.026                |
| 194 <i>a</i> → 218 <i>a</i> | HOMO-22 → LUMO+1      | 2.948       | 0.027                |
| 195 <i>a</i> → 217 <i>a</i> | HOMO-21 → LUMO        | 2.718       | 0.037                |
| 196 <i>a</i> → 219 <i>a</i> | HOMO-20 → LUMO+2      | 2.869       | 0.034                |
| 199 <i>a</i> → 219 <i>a</i> | HOMO-17 → LUMO+2      | 2.649       | 0.033                |
| 199 <i>a</i> → 220 <i>a</i> | HOMO-17 → LUMO+3      | 2.764       | 0.047                |
| 201 <i>a</i> → 220 <i>a</i> | HOMO-15 → LUMO+3      | 2.674       | 0.011                |
| 203 <i>a</i> → 220 <i>a</i> | HOMO-13 → LUMO+3      | 2.571       | 0.060                |
| 205 <i>a</i> → 221 <i>a</i> | HOMO-11 → LUMO+4      | 2.908       | 0.022                |
| 206 <i>a</i> → 222 <i>a</i> | HOMO-10 → LUMO+5      | 3.16        | 0.012                |
| 208 <i>a</i> → 221 <i>a</i> | HOMO-8 → LUMO+4       | 2.604       | 0.029                |
| 210 <i>a</i> → 222 <i>a</i> | HOMO-6 → LUMO+5       | 2.784       | 0.170                |

**Table S3.** The conversion rate of 4-NP in 4 min

| [CuH] <sub>6</sub> | <b>Cu<sub>6</sub>-1</b> | <b>Cu<sub>6</sub>-2</b> | <b>Cu<sub>6</sub>-3</b> |
|--------------------|-------------------------|-------------------------|-------------------------|
| Conversion rate %  | 49                      | 62                      | 100                     |

**Table S4.** Catalysis recycle test of **Cu<sub>6</sub>-3**

| Number of cycles <sup>a</sup> | Conversion rate % <sup>b</sup> |
|-------------------------------|--------------------------------|
| 1                             | 100                            |
| 2                             | 100                            |
| 3                             | 100                            |
| 4                             | 100                            |
| 5                             | 40                             |

<sup>a</sup>Reaction condition: 4-NP (1 mL, 0.1 mM), NaBH<sub>4</sub> (2.5 mg,  $6.48 \times 10^{-2}$  mmol), **Cu<sub>6</sub>-3** ( $1.02 \times 10^{-3}$  mmol). <sup>b</sup>Monitored by UV-vis absorption spectra.

## Spectroscopic Data

**Cu<sub>6</sub>-2**, <sup>1</sup>H NMR (500 MHz, C<sub>6</sub>D<sub>6</sub>) δ 1.20-1.46 (m, 90H), 1.62-1.73 (m, 36H), 1.73-1.81 (m, 36H), 1.91-2.00 (m, 36H), 2.41 (s, 6H)

**Cu<sub>6</sub>-3**, <sup>1</sup>H NMR (500 MHz, C<sub>6</sub>D<sub>6</sub>) δ 0.90-0.92 (m, 54H), 1.36-1.45 (m, 252H), 2.36 (s, 6H)
